# Supplementary material for: How to assure access of essential RMNCH medicines by looking at policy and systems factors: an analysis of countdown to 2015 countries
Source: Springer Nature journal article supplement (doi:10.1186/s12913-018-3766-6), 2018-12-01
Supplement: MOESM2 [file 16324660]

## Additional File 2: Indicators and Data Sources

| Indicators                                                                                                                        | Data Sources                                                                                                                                                                                                                                                                     |
|-----------------------------------------------------------------------------------------------------------------------------------|----------------------------------------------------------------------------------------------------------------------------------------------------------------------------------------------------------------------------------------------------------------------------------|
| <b>Policy</b>                                                                                                                     |                                                                                                                                                                                                                                                                                  |
| 1. % of countries with a current (updated in the last 2 years) essential medicines list (EML)                                     | WHO Essential Medicines and Health Products Information Portal for national EMLs                                                                                                                                                                                                 |
| 2. % of countries with an EML that includes tracer RMNCH medicines *                                                              | WHO health systems and policy survey 2014 dataset and WHO Regulatory and procurement survey 2014 complemented by RMNCH Landscape Synthesis for certain countries depending on commodity as RH commodities were not included in WHO health systems and policy survey 2014 dataset |
| 3. % of countries with RMNCH tracer medicines in standard treatment guidelines (STGs)                                             | WHO health systems and policy survey 2014 dataset<br>WHO Regulatory and procurement survey 2014                                                                                                                                                                                  |
| 4. % of countries where RMNCH tracer medicines in the STG are also on the EML*                                                    | WHO health systems and policy survey 2014 dataset<br>WHO Regulatory and procurement survey 2014<br>RMNCH Landscape Synthesis                                                                                                                                                     |
| 5. % of countries with a national policy on the use of community management of pneumonia                                          | WHO health systems and policy survey 2014 dataset                                                                                                                                                                                                                                |
| 6. % of countries with a national policy on the use of community management of diarrhea                                           | WHO health systems and policy survey 2014 dataset                                                                                                                                                                                                                                |
| <b>Regulatory</b>                                                                                                                 |                                                                                                                                                                                                                                                                                  |
| 7. % of countries where tracer medicines have at least one product registered for use in country *                                | WHO Regulatory and procurement survey 2014<br>RMNCH Landscape Synthesis                                                                                                                                                                                                          |
| 8. % of countries where quality problems are reported                                                                             | WHO Regulatory and procurement survey 2014<br>RMNCH Landscape Synthesis                                                                                                                                                                                                          |
| 9. % of countries where medicines (including RMNCH medicines) products are routinely sampled for quality testing                  | WHO Regulatory and procurement survey 2014<br>RMNCH Landscape Synthesis                                                                                                                                                                                                          |
| <b>Procurement</b>                                                                                                                |                                                                                                                                                                                                                                                                                  |
| 10. % of countries where RMNCH commodities are procured centrally *                                                               | WHO Regulatory and procurement survey 2014<br>RMNCH Landscape Synthesis                                                                                                                                                                                                          |
| <b>Financing</b>                                                                                                                  |                                                                                                                                                                                                                                                                                  |
| 11. % of countries with a costed MNCH plan                                                                                        | WHO health systems and policy survey 2014 dataset                                                                                                                                                                                                                                |
| 12. % of countries with fees for services in the public sector                                                                    | WHO health systems and policy survey 2014 dataset                                                                                                                                                                                                                                |
| 13. % of countries with fees for services where women and children under 5 are exempt from paying for RMNCH services or medicines | WHO health systems and policy survey 2014 dataset                                                                                                                                                                                                                                |
| 14. % of countries where the RMNCH commodities are provided free of charge in public sector *                                     | WHO Regulatory and procurement survey 2014                                                                                                                                                                                                                                       |
| <b>Supply Chain Management</b>                                                                                                    |                                                                                                                                                                                                                                                                                  |
| 15. % of countries with a pull (demand-based) distribution method to health facilities                                            | WHO Regulatory and procurement survey 2014                                                                                                                                                                                                                                       |

|                                                                                                                    |                                                                         |
|--------------------------------------------------------------------------------------------------------------------|-------------------------------------------------------------------------|
| 16. % of countries with stock outs of RMNCH tracer products reported at CMS in last 3 years *                      | WHO Regulatory and procurement survey 2014                              |
| <b>Information systems</b>                                                                                         |                                                                         |
| 17. % of countries with a LMIS system to track stock-level/consumption of medicines (paper, electronic, or mobile) | WHO Regulatory and procurement survey 2014                              |
| 18. % of countries where all tracer RMNCH commodities are included in existing LMIS*                               | WHO Regulatory and procurement survey 2014<br>RMNCH Landscape Synthesis |
