# Supplementary material for: How to assure access of essential RMNCH medicines by looking at policy and systems factors: an analysis of countdown to 2015 countries
Source: Springer Nature journal article supplement (doi:10.1186/s12913-018-3766-6), 2018-12-01
Supplement: MOESM3 [file 16324660]

**Additional file 3: Reproductive and maternal health commodity policy and systems indicators for a subset of countries** (countries arranged in order of increasing gap with CD 2015 targets)

|                                                      | Country A | Country B | Country C | Country D | Country E | Country F | Country G | Country H | Country I | Country J |
|------------------------------------------------------|-----------|-----------|-----------|-----------|-----------|-----------|-----------|-----------|-----------|-----------|
| <b>POLICY</b>                                        |           |           |           |           |           |           |           |           |           |           |
| Policy for AMTSL                                     | Y         | Y         | Y         | Y         | Y         | Y         | Y         | Y         | Y         | Y         |
| All RH commodities on EML (3)                        | N 2/3     | N 0/3     | N 2/3     | N 2/3     | N 1/3     | N 1/3     | Y         | Y         | N 1/3     | Y         |
| All MH commodities on EML (4)                        | Y         | Y         | N 3/4     | Y         | Y         | N 3/4     | Y         | Y         | Y         | Y         |
| EML is current                                       | N         | Y         | Y         | N         | N         | N         | N         | Y         | N         | N         |
| All RH commodities on STG (3)                        | Y         | N 1/2     | Y 2/2     | Y 2/2     | N 1/2     | Y         | Y         | Y         | Y 1/1     | Y         |
| All MH commodities on STG (4)                        | Y         | N 3/4     | Y         | Y         | Y         | Y 3/3     | Y 3/3     | Y         | Y         | Y         |
| <b>REGULATORY</b>                                    |           |           |           |           |           |           |           |           |           |           |
| At least 1 product registered for all RH commodities | Y         | -         | Y         | N 2/3     | N 2/3     | N 2/3     | N 0/3     | N 2/3     | -         | N 2/3     |
| At least 1 product registered for all MH commodities | Y         | -         | N 2/4     | Y         | N 3/4     | N 3/4     | N 3/4     | Y         | -         | N 3/4     |
| Quality problems reported                            | Y         | -         | Y         | Y         | Y         | Y         | -         | Y         | -         | Y         |
| Medicines sampled for quality testing                | Y         | -         | Y         | Y         | Y         | Y         | -         | Y         | -         | Y         |
| <b>PROCUREMENT</b>                                   |           |           |           |           |           |           |           |           |           |           |
| All RH products procured centrally in last year (3)  | N 2/3     | N 1/3     | N 1/3     | Y         | N 2/3     | N 0/3     | Y         | Y         | N 1/3     | Y         |
| All MH products procured centrally in last year (4)  | Y         | Y         | N 3/4     | Y         | Y         | Y 3/3     | Y 3/3     | Y         | N 2/4     | Y         |
| <b>FINANCING</b>                                     |           |           |           |           |           |           |           |           |           |           |
| All RH commodities provided free of charge (3)       | Y         | Y 1/1     | Y 2/2     | Y 2/2     | Y 2/2     | Y         | N 1/3     | N 1/3     | Y 1/1     | Y         |
| All MH commodities provided free of charge (4)       | Y         | Y         | Y         | Y         | Y 3/3     | Y 3/3     | Y         | N 0/4     | N 0/3     | Y         |
| Costed MH plan                                       | Y         | Y         | Y         | Y         | Y         | Y         | -         | Y         | Y         | Y         |
| Fees for services in public sector                   | N         | N         | Y         | N         | N         | Y         | Y         | Y         | Y         | Y         |
| Women exempt                                         | -         | -         | Y         | -         | -         | Y         | -         | N         | N         | N         |
| <b>SUPPLY CHAIN MANAGEMENT</b>                       |           |           |           |           |           |           |           |           |           |           |
| Pull distribution method                             | Y         | N         | Y         | N         | -         | N         | N         | N         | -         | N         |
| No Stock outs at CMS in last 3 years for RH          | 1/3       | -         | *         | *         | 2/2       | 2/3       | *         | *         | 1/1       | 0/3       |
| No Stock outs at CMS in last 3 years for MH          | ¾         | -         | ¼         | ¾         | ¾         | 3/3       | 1/3       | *         | *         | 0/1       |
| <b>INFORMATION SYSTEMS</b>                           |           |           |           |           |           |           |           |           |           |           |
| LMIS system to track medicines                       | Y         | N         | Y         | Y         | Y         | Y         | Y         | -         | Y         | Y         |
| All RH commodities tracked by LMIS (3)               | Y         | N 0/3     | Y         | N 1/3     | Y 2/2     | Y         | Y         | Y 2/2     | N 1/3     | Y         |
| All MH commodities tracked by LMIS (4)               | Y         | N 0/4     | N 3/4     | N 0/4     | Y         | Y 3/3     | Y 3/3     | Y         | N 2/4     | Y         |
| <b>HEALTH OUTCOME</b>                                |           |           |           |           |           |           |           |           |           |           |
| MMR from Countdown report 2015                       | 420       | 400       | 410       | 360       | 510       | 1100      | 650       | 320       | 450       | 470       |
| CD 2015 MMR target                                   | 350       | 300       | 230       | 200       | 280       | 580       | 280       | 130       | 170       | 130       |
| pending gap as % of 2014 MMR                         | 17        | 25        | 44        | 44        | 45        | 47        | 57        | 59        | 62        | 72        |

**Key:** Colors depend on # of commodities fulfilling indicator condition for each country. Green: > 75% of the commodities for that indicator; yellow 60-75% of the commodities; red: <60% of the commodities. Where information was available for the full set of commodities there is a \* in the cell; where information was available for less than the full number of commodities the number was specified. Where there was no data the cell was left white. Health outcome: mortality gap was shaded red if over 60% and yellow if between 25 and 60%
