# Supplementary material for: How to assure access of essential RMNCH medicines by looking at policy and systems factors: an analysis of countdown to 2015 countries
Source: Springer Nature journal article supplement (doi:10.1186/s12913-018-3766-6), 2018-12-01
Supplement: MOESM4 [file 16324660]

**Additional file 4: Newborn and child health commodity policy and systems indicators for a subset of countries** (countries in order of increasing gap with CD 2015 targets)

|                                                     | Country E | Country A | Country D | Country C | Country H | Country G | Country F | Country B | Country I | Country J |
|-----------------------------------------------------|-----------|-----------|-----------|-----------|-----------|-----------|-----------|-----------|-----------|-----------|
| <b>POLICY</b>                                       |           |           |           |           |           |           |           |           |           |           |
| Policy for community management of child            | Y         | Y         | Y         | N         | Y         | Y         | Y         | Y         | Y         | N         |
| All NH commodities on EML (5)                       | Y         | N 4/5     | N 4/5     | N 4/5     | Y         | Y         | N 4/5     | Y         | N 4/5     | Y         |
| All CH commodities on EML (3)                       | N 2/3     | N 2/3     | Y         | Y         | Y         | Y         | N 2/3     | Y         | N 2/3     | Y         |
| EML is current                                      | N         | N         | N         | Y         | Y         | Y         | N         | Y         | N         | N         |
| All NH commodities on STG (5)                       | N 4/5     | Y 4/4     | Y         | Y 3/3     | Y 3/3     | Y         | Y         | N 3/5     | Y 4/4     | Y         |
| All CH commodities on STG (3)                       | Y         | Y         | Y         | Y         | Y 2/2     | Y         | Y         | Y         | Y 2/2     | Y         |
| <b>REGULATORY</b>                                   |           |           |           |           |           |           |           |           |           |           |
| At least 1 product registered for all NH            | N 4/5     | N 4/5     | N 4/5     | N 2/5     | N 4/5     | Y         | N 3/5     | -         | -         | Y         |
| At least 1 product registered for all CH            | Y         | N 1/3     | Y         | N 2/3     | N 2/3     | N 2/3     | Y         | -         | -         | Y         |
| Quality problems reported                           | Y         | Y         | Y         | Y         | Y         | -         | Y         | -         | -         | Y         |
| Medicines sampled for quality testing               | Y         | Y         | Y         | Y         | Y         | -         | Y         | -         | -         | Y         |
| <b>PROCUREMENT</b>                                  |           |           |           |           |           |           |           |           |           |           |
| All NH products procured centrally in last year (5) | Y         | Y 4/4     | Y 3/3     | Y 4/4     | Y         | Y         | Y         | N 4/5     | N 4/5     | N 4/5     |
| All CH products procured centrally in last year (3) | Y         | N 2/3     | N 0/2     | Y         | Y         | Y         | Y         | Y         | N 1/3     | Y         |
| <b>FINANCING</b>                                    |           |           |           |           |           |           |           |           |           |           |
| All NH commodities provided free of charge (5)      | Y 4/4     | Y 4/4     | Y         | -         | N 0/3     | N 0/5     | Y         | N 4/5     | N 0/4     | Y         |
| All CH commodities provided free of charge (3)      | Y 2/2     | Y         | Y         | Y         | N 0/2     | N 0/3     | Y         | Y         | N 1/2     | Y         |
| Costed NH plan                                      | Y         | Y         | Y         | Y         | Y         | -         | Y         | Y         | Y         | Y         |
| Costed CH plan                                      | Y         | Y         | Y         | Y         | Y         | -         | Y         | Y         | Y         | Y         |
| Fees for services in public sector                  | N         | N         | N         | Y         | Y         | Y         | Y         | N         | Y         | Y         |
| Newborns exempt                                     | -         | -         | -         | Y         | N         | N         | Y         | -         | N         | N         |
| Children exempt                                     | -         | -         | -         | Y         | N         | N         | Y         | -         | N         | N         |
| <b>SUPPLY CHAIN MANAGEMENT</b>                      |           |           |           |           |           |           |           |           |           |           |
| Pull distribution method                            | -         | Y         | N         | Y         | N         | N         | N         | N         | -         | N         |
| No Stock outs at CMS in last 3 years for NH         | *         | 4/4       | 4/5       | 2/4       | *         | 0/5       | 1/1       | -         | 4/4       | -         |
| No Stock outs at CMS in last 3 years for CH         | 2/3       | 1/2       | 1/2       | *         | *         | 0/3       | -         | -         | 2/2       | 0/1       |
| <b>INFORMATION SYSTEMS</b>                          |           |           |           |           |           |           |           |           |           |           |
| LMIS system to track medicines                      | Y         | Y         | Y         | Y         | -         | Y         | Y         | N         | Y         | Y         |
| All NH commodities tracked by LMIS (5)              | Y         | Y 4/4     | N 0/3     | Y 3/3     | Y         | Y         | Y         | N         | Y 4/4     | Y 4/4     |
| All CH commodities tracked by LMIS (3)              | Y         | Y 2/2     | N 0/3     | Y         | Y 2/2     | Y         | Y         | N 0/3     | Y 1/1     | Y         |
| <b>HEALTH OUTCOME</b>                               |           |           |           |           |           |           |           |           |           |           |
| U5 MR from Countdown report 2015                    | 64        | 59        | 55        | 49        | 47        | 94        | 120       | 91        | 78        | 71        |
| CD 2015 U5MR target                                 | 81        | 68        | 62        | 55        | 47        | 79        | 88        | 60        | 49        | 25        |
| Pending gap as % of 2014 U5MR                       | -27       | -15       | -13       | -12       | 0         | 16        | 27        | 34        | 37        | 65        |

**Key:** Same country codes as for additional file 3. Colors depend on # of commodities fulfilling indicator condition for each country. Green: > 75% (i.e. 3/4 or 4/5 of the commodities for that indicator; yellow 60-75% of the commodities; red: <60% (or 2/3) of the commodities. Where information was available for the full set of commodities there is a \* in the cell; where information was available for less than the full number of commodities the number was specified. Where there was no data the cell was left white. Health outcome: mortality gap was shaded red if over 60% and yellow if between 25 and 60% and green for no gap or negative gap
